# Supplementary material for: Machine Learning and Pharmacometrics for Prediction of Pharmacokinetic Data: Differences, Similarities and Challenges Illustrated with Rifampicin
Source: MDPI journal article supplement (doi:10.3390/pharmaceutics14081530), 2022-07-22
Supplement: s1 [file s1]

## Supplementary Table S1

Supplement to:

Title: Machine learning and pharmacometrics for prediction of pharmacokinetic data: Differences, similarities and challenges illustrated with rifampicin

Authors: Lina Keutzer<sup>1‡</sup>, Huifang You<sup>1‡</sup>, Ali Farnoud<sup>2</sup>, Joakim Nyberg<sup>3</sup>, Sebastian G Wicha<sup>4</sup>, Gareth Maher-Edwards<sup>5</sup>, Georgios Vlasakakis<sup>5</sup>, Gita Khalili Moghaddam<sup>5</sup>, Elin M Svensson<sup>3,8</sup>, Michael Menden<sup>3,6,7</sup>, Ulrika SH Simonsson<sup>1\*</sup>

### Affiliations:

<sup>1</sup>Department of Pharmaceutical Biosciences, Uppsala University, Uppsala, Sweden, Ulrika.Simonsson@farmbio.uu.se;

<sup>2</sup>Institute of Computational Biology, Helmholtz Zentrum München, Munich, Germany;

<sup>3</sup>Department of Pharmacy, Uppsala University, Uppsala, Sweden;

<sup>4</sup>Department of Clinical Pharmacy, Institute of Pharmacy, University of Hamburg, Hamburg, Germany;

<sup>5</sup>Research, Clinical Pharmacology Modelling & Simulation, GlaxoSmithKline, London, UK;

<sup>6</sup>Department of Biology, Ludwig-Maximilians University Munich, Martinsried, Germany;

<sup>7</sup>German Center for Diabetes Research (DZD e.V.), Neuherberg, Germany;

<sup>8</sup>Department of Pharmacy, Radboud institute of health sciences, Radboud university medical center, Nijmegen, The Netherlands

<sup>‡</sup>These authors contributed equally

\*Correspondence: Ulrika.Simonsson@farmbio.uu.se, Department of Pharmaceutical Biosciences, Uppsala University, Box 591, 75124 Uppsala, Sweden

## Supplementary Table S1

**Table S1.** Final model hyperparameters for the different machine learning models.

| Algorithm                                  | Hyperparameter    | Hyperparameter interval                | Hyperparameter values AUC models | Hyperparameter values longitudinal models |
|--------------------------------------------|-------------------|----------------------------------------|----------------------------------|-------------------------------------------|
| <b>LASSO</b>                               | Lambda            | (5:20, steps = 1)                      | 5                                | 5                                         |
| <b>Random Forest</b>                       | Mtry              | (1:20, steps = 1)                      | 6                                | 9                                         |
| <b>Gradient Boosting Machine (GBM)</b>     | n.trees           | (100, 150, 200, 250, 300, 350, 400)    | 350                              | 200                                       |
|                                            | Interaction.depth | (1:18, steps = 1)                      | 1                                | 5                                         |
|                                            | Shrinkage         | (0.01, 0.1, 0.9)                       | 0.01                             | 0.1                                       |
|                                            | n.minobsinnode    | (0.005, 0.01, 0.1, 0.5, 1, 5, 10, 20)  | 0.01                             | 5                                         |
| <b>Extreme Gradient Boosting (XGBoost)</b> | Nrounds           | (200:1000, steps = 50)                 | 650                              | 1000                                      |
|                                            | Eta               | (0.005, 0.01, 0.015, 0.025, 0.05, 0.1) | 0.005                            | 0.01                                      |
|                                            | Max_depth         | (1, 2, 3, 4, 5, 6, 10)                 | 3                                | 4                                         |
|                                            | Gamma             | (0, 0.05, 0.1, 0.5, 0.7, 0.9, 1.0)     | 0.5                              | 0.9                                       |
|                                            | Colsample_bytree  | (0.4, 0.6, 0.8, 1)                     | 1                                | 0.8                                       |
|                                            | Min_child_weight  | (1:20, steps = 1)                      | 3                                | 8                                         |
|                                            | Subsample         | (0.1, 0.2, 0.5, 0.75, 1)               | 0.2                              | 0.5                                       |

*Colsample\_bytree*, subsample ratio of columns when constructing each tree; *eta*, scales the contribution of each tree by a factor (between 0 and 1); *gamma*, minimum loss reduction required to make a further partition on a leaf node of the tree; *interaction.depth*, maximum depth of each tree; *max\_depth*, maximum tree depth; *min\_child\_weight*, minimum number of instances needed in each node; *mtry*, number of variables randomly sampled as candidates at each split; *n.minobsinnode*, minimum number of observations in the terminal nodes of the trees; *nrounds*, maximum number of iterations; *n.trees*, total number of trees to fit; *shrinkage*, learning rate or step-size reduction; *subsample*, subsample ratio of the training data used prior to growing trees.
